# Supplementary material for: Habitat selection of resident and non-resident gray wolves: implications for habitat connectivity
Source: PubMed Central journal article supplement (PMC10663587; doi:10.1038/s41598-023-47815-0), 2023-11-21

## Supplemental information

### Manuscript title:

Habitat selection of resident and non-resident gray wolves: implications for habitat connectivity

**Appendix A.** Used-habitat calibration plots for proportion of natural cover (top panel) and road density (km/km<sup>2</sup>, bottom panel) used in a step-selection function for gray wolves (*Canis lupus*) in the western Great Lakes region, USA, and southern Ontario and Manitoba, Canada, 2017–2021.

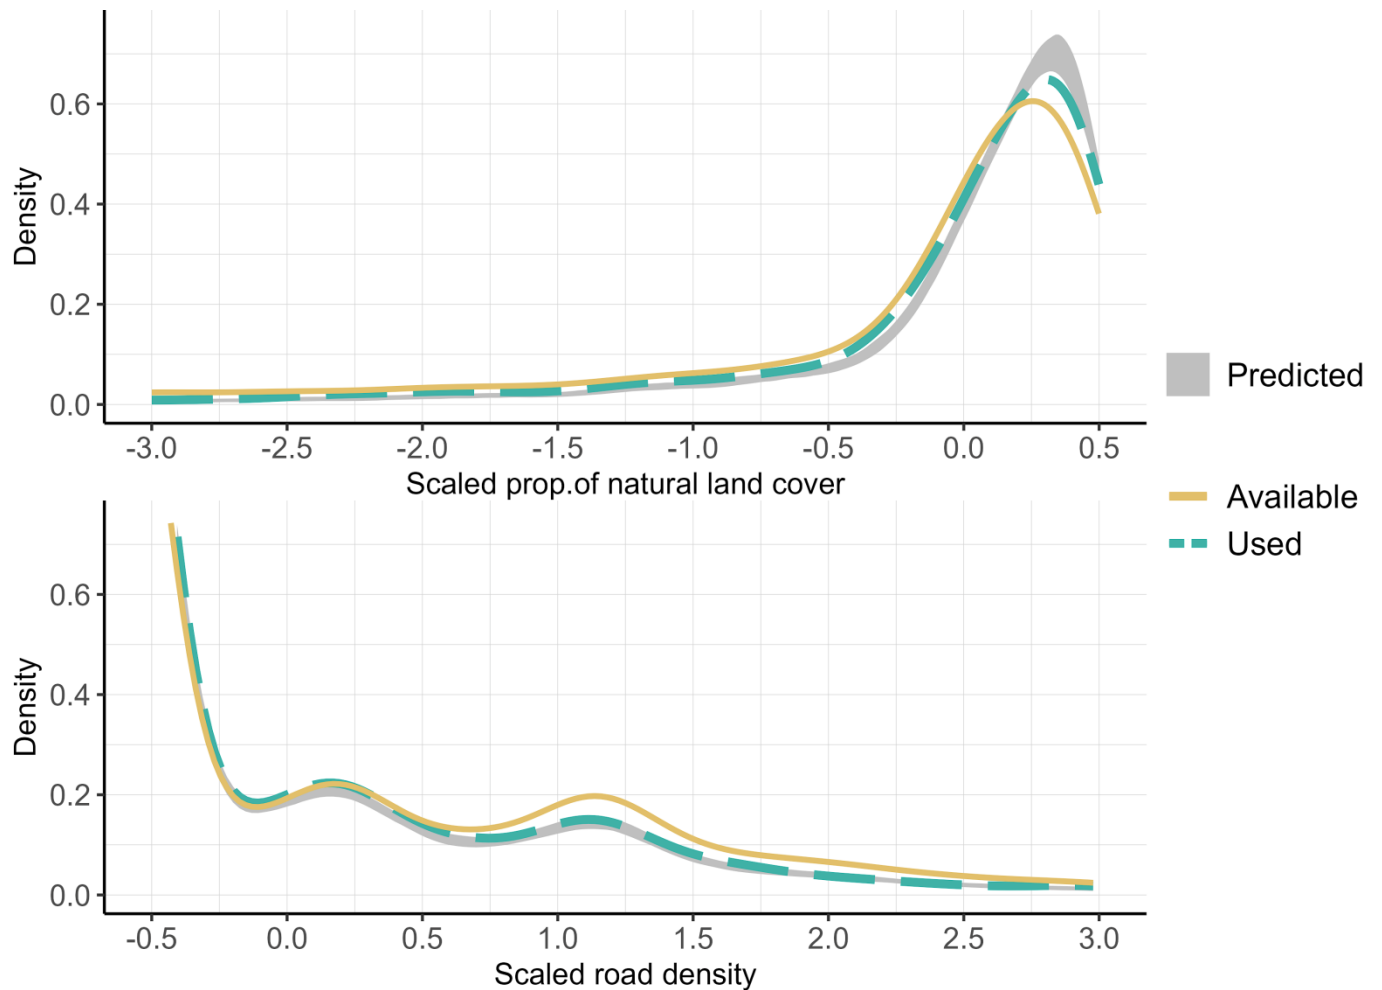

**Appendix B.** Predicted relative selection strength (RSS) for the western Great Lakes distinct population segment of gray wolves (*Canis lupus*), USA and southern Ontario and Manitoba, Canada based on a step-selection function, along with an approximate southern border of wolf range. Figures were created using ArcGIS Pro 3.0.0 (<https://www.esri.com>).

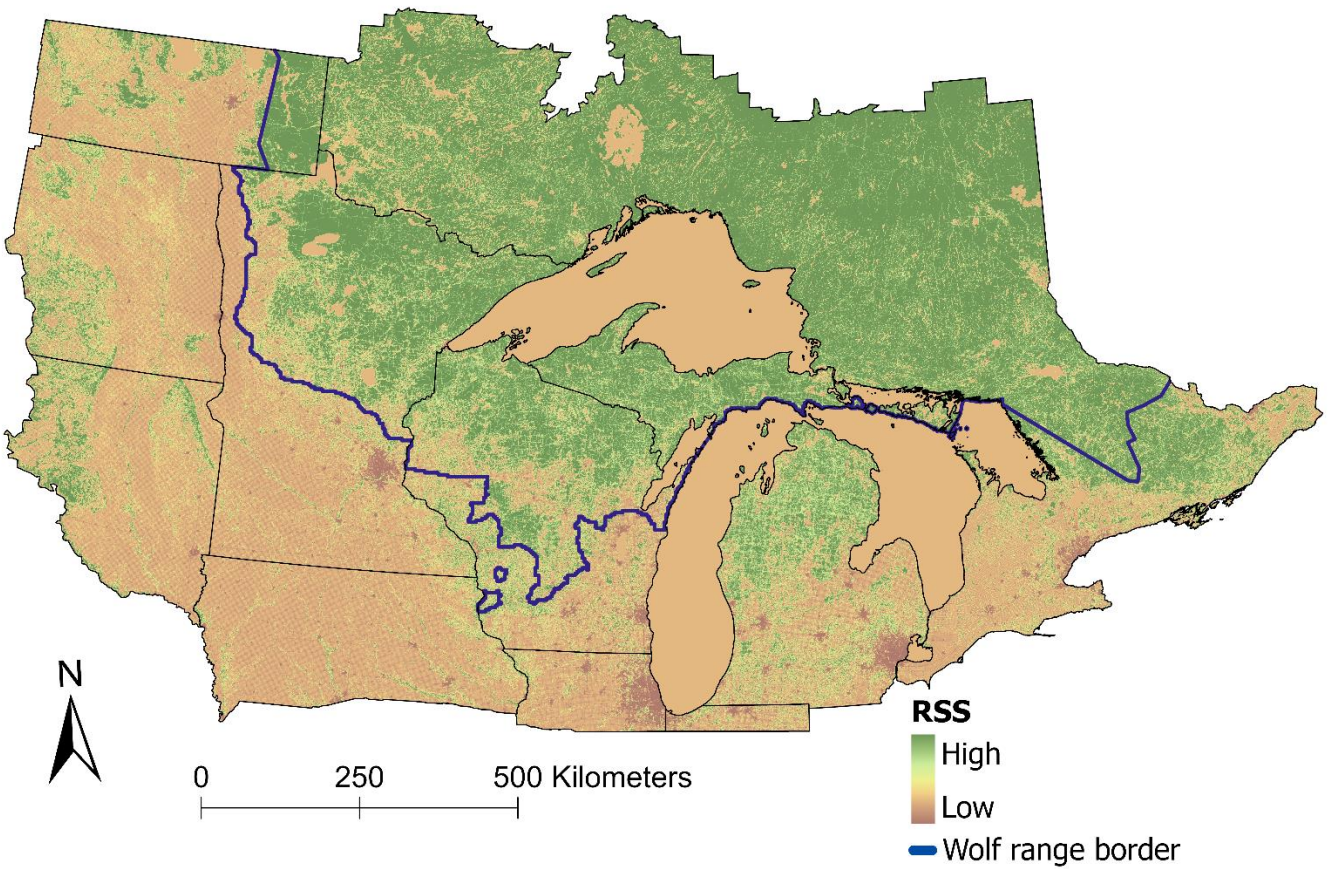

Supplement: 41598_2023_47815_MOESM1_ESM.pdf [file 41598_2023_47815_MOESM1_ESM.pdf]
